# Supplementary material for: Source-resolved atmospheric metal emissions, concentrations, and their deposition fluxes into the East Asian Seas
Source: Copernicus journal article supplement (doi:10.5194/egusphere-2024-155), 2024-01-22
Supplement: Supplementary file 1 [file egusphere-2024-155-supplement.pdf]

1 **Supplementary Materials for**  
2 **Source-resolved atmospheric metal emissions, concentrations, and**  
3 **their deposition fluxes into the East Asian Seas**

4 Shenglan Jiang<sup>1</sup>, Yan Zhang<sup>1,2,3\*</sup>, Guangyuan Yu<sup>1</sup>, Zimin Han<sup>1</sup>, Junri Zhao<sup>1</sup>, Tianle Zhang<sup>4</sup>, Mei Zheng<sup>4</sup>

5  
6 <sup>1</sup>Shanghai Key Laboratory of Atmospheric Particle Pollution and Prevention (LAP3), National Observations and Research  
7 Station for Wetland Ecosystems of the Yangtze Estuary, Department of Environmental Science and Engineering, Fudan  
8 University, Shanghai 200438, China

9 <sup>2</sup>Shanghai Institute of Eco Chongming (SIEC), Shanghai 200062, China

10 <sup>3</sup>MOE laboratory for National Development and Intelligent Governance, Shanghai institute for energy and carbon neutrality  
11 strategy, IRDR ICoE on Risk Interconnectivity and Governance on Weather/Climate Extremes Impact and Public Health,  
12 Fudan University, China, Fudan University, Shanghai 200433, China

13 <sup>4</sup>SKL-ESPC and SEPKL-AERM, College of Environmental Sciences and Engineering, and Centre for Environment and Health,  
14 Peking University, Beijing 100871, China

15 *Correspondence to:* Yan Zhang ([yan\\_zhang@fudan.edu.cn](mailto:yan_zhang@fudan.edu.cn))

16 **This Supplementary Materials include:**

17 Supplementary Text S1-S3, Figure S1-S4, and Table S1-S10.

18

19 **Text S1. Technical details of the modified CMAQ.** For the revisions of modules for simulate metals in CMAQ, we  
20 modified desid\_vars.F to add metals emission information. To have tracers undergo the same diffusion, advection, and  
21 deposition as PM, we modified AERO\_DATA.F, CMAQ\_Control\_DESID\_cb6r5\_ae7\_aq.nml, AE\_cb6r5\_ae7\_aq.nml files.

22 **Text S2. Technical details of the WRF/CMAQ.** The WRF physics scheme configuration included the Pleim-Xiu land  
23 surface model (Xiu and Pleim, 2001), the Rapid Radiative Transfer Model (RRTMG) for shortwave and longwave schemes  
24 (Clough et al., 2005), the Asymmetric Convective Model version 2 for the PBL scheme (Pleim, 2007), the Kain–Fritsch  
25 cumulus scheme (Kain, 2004) for cumulus parameterization, and the MODIS land cover data (20 categories) employed in  
26 this study. In the CMAQ model, two grids on WRF lateral boundary were removed, and thus there were  $257 \times 117$  grids in  
27 d01.

28 **Text S3. Establishment of emission inventory of pollutants other than metals.**

29 For SO<sub>2</sub>, NO<sub>x</sub>, CO, nonmethane volatile organic compounds (NMVOCs), PM<sub>10</sub>, PM<sub>2.5</sub> and NH<sub>3</sub>, we categorized them into  
30 land anthropogenic and ship sources. For anthropogenic sources, we used the Multiresolution Emission Inventory for China  
31 (MEIC) in 2020 (Zheng et al., 2021) in mainland China and the MIX emission data in 2010 (Li et al., 2017) in Asia  
32 excluding mainland China. For ship sources, we used A bottom-up ship emission model based on the Automatic  
33 Identification System (AIS) data to calculate the emission inventories of these species. Detailed information on the  
34 establishment of the ship emission model can be found in the previous studies (Chen et al., 2017; Fan et al., 2016).

35

36 **Figure S1.** The simulation area.

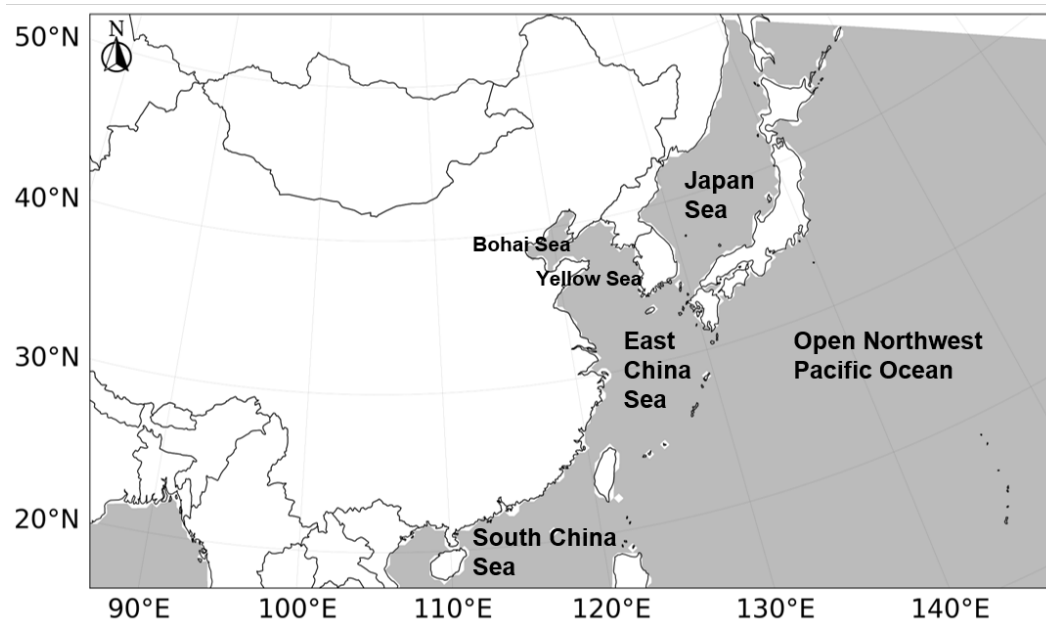

37

38

39 **Figure S2.** Spatial distribution of the contributions of land anthropogenic, dust sources and ship sources to the annual  
 40 average concentrations of Fe (a-c), Al (d-f), V (g-i), Ni (j-l), Zn (m-o), and Cu (p-r) in the sea area, respectively (36 km × 36  
 41 km resolution) in the year of 2017.

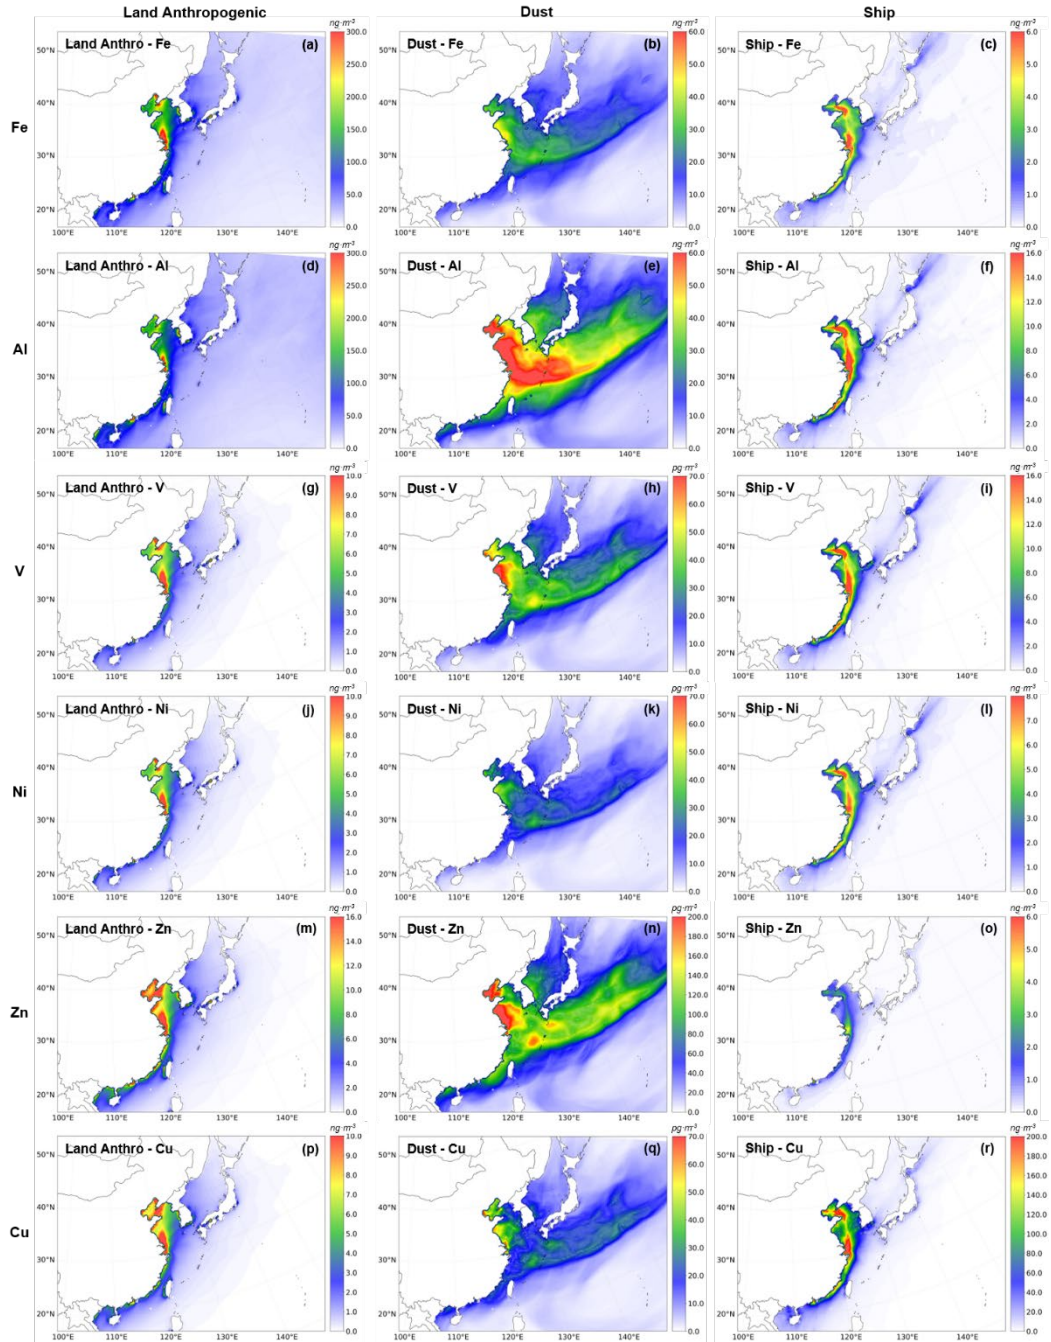

42  
 43

44 **Figure S3.** Spatial distribution of depositional fluxes of Fe (a), V (b), Zn (c), Al (d), Ni (e), Cu (f) in the sea area (36 km × 36  
45 km resolution, considering all emission sources) in the year of 2017.

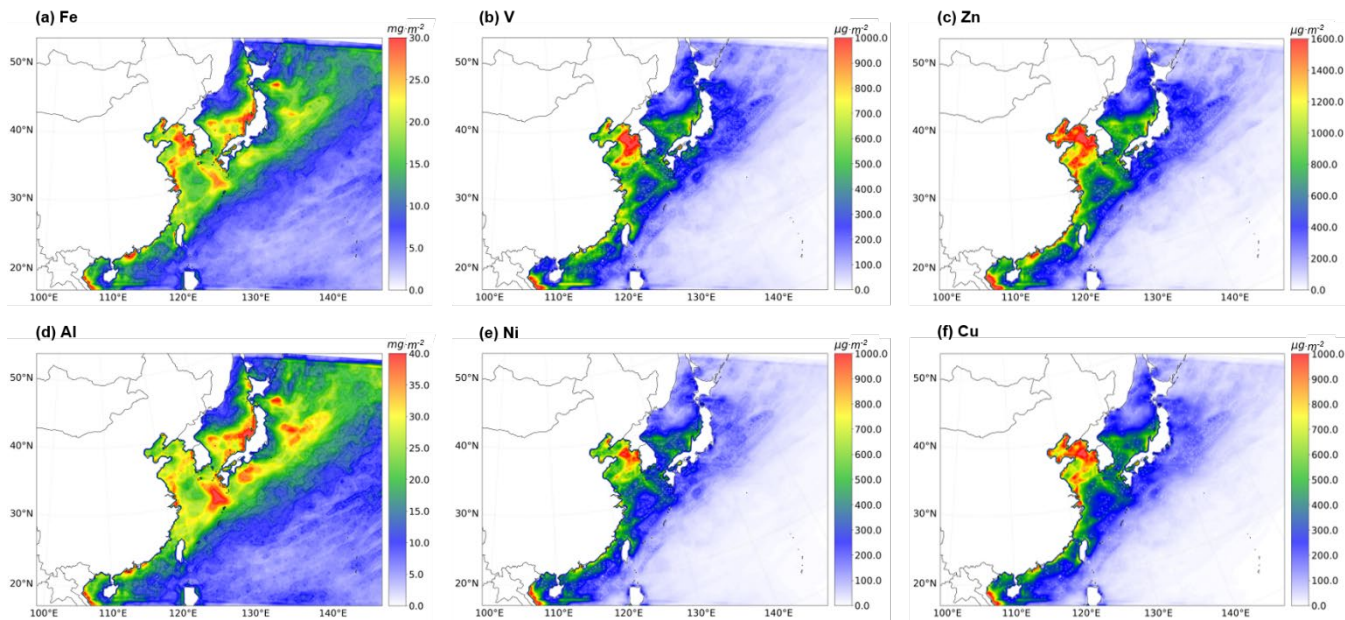

46

47

48 **Figure S4.** Absolute and relative contributions of soluble iron deposition fluxes from land anthropogenic, ship, and dust  
 49 sources in different sea areas, fine mode (a), coarse mode (b) (units:  $\mu\text{g}\cdot\text{m}^{-2}\cdot\text{year}^{-1}$ ), the numbers on top of the stacked bar  
 50 graphs represent total deposition fluxes from three sources.

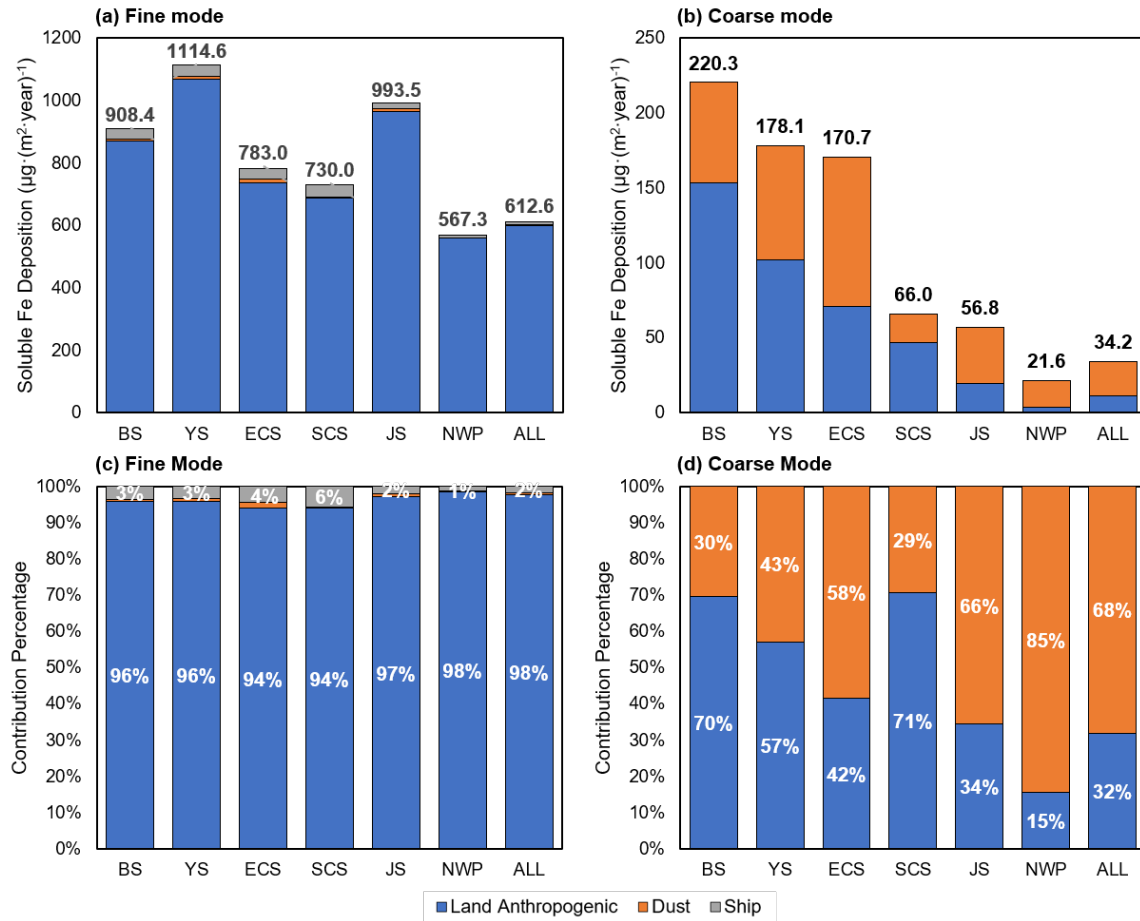

51

52

53 **Table S1.** Emission factors for ships in previous studies (Unit: g·kWh<sup>-1</sup>)

| Engine type | Fuel Type | Sulfur content (%) | Cu       | Fe       | V        | Ni       | Zn       | Al       | Source                    |
|-------------|-----------|--------------------|----------|----------|----------|----------|----------|----------|---------------------------|
| ME SSD      | HFO       | 2.70               | 1.80E-05 | 4.90E-03 | 1.94E-02 | 9.50E-03 | 1.30E-04 | 6.10E-04 | (Celo et al., 2015)       |
| ME SSD      | HFO       | 2.85               | 5.00E-05 | 6.75E-03 | 1.99E-02 | 8.69E-03 | 2.00E-04 | 1.87E-02 | (Agrawal et al., 2008a)   |
| ME SSD      | HFO       | 2.05               | 1.01E-04 | 3.89E-03 | 5.60E-02 | 1.27E-02 | 1.43E-04 | 1.72E-02 | (Agrawal et al., 2008b)   |
| ME MSD      | HFO       | 1.48               | 3.00E-06 | 4.10E-04 | 6.80E-03 | 2.43E-03 | 1.00E-04 | 2.30E-03 | (Celo et al., 2015)       |
| ME MSD      | HFO       | 2.21               | 3.00E-06 | 2.40E-03 | 1.23E-02 | 5.50E-03 | 8.00E-05 | 4.90E-04 |                           |
| ME MSD      | HFO       | 2.33               | 1.35E-05 | 2.22E-04 | 1.54E-03 | 2.91E-04 | 5.96E-05 | 1.37E-04 | (Corbin et al., 2018)     |
| ME MSD      | HFO       | 0.58               |          | 1.21E-04 | 4.27E-04 | 1.06E-03 | 6.50E-05 | 8.36E-05 | (Moldanová et al., 2013)  |
| ME MSD      | HFO       | 0.96               |          | 2.46E-04 | 1.69E-03 | 1.50E-03 | 6.63E-05 | 2.08E-05 |                           |
| ME MSD      | HFO       | 2.70               | 1.49E-04 | 1.27E-03 | 1.43E-02 | 4.10E-03 | 5.80E-04 | 1.79E-04 | (Sippula et al., 2014)    |
| ME MSD      | HFO       | 0.68               | 3.25E-05 | 1.55E-03 | 8.55E-06 | 1.62E-05 | 1.31E-04 |          | (Zhang et al., 2018a)     |
| ME MSD      | HFO       | 1.60               | 3.60E-04 | 5.30E-03 | 7.90E-03 | 2.00E-03 | 1.30E-03 | 2.60E-04 | (Streibel et al., 2017)   |
| ME MSD      | HFO       | 0.48               |          | 1.62E-02 | 3.60E-02 | 2.75E-01 | 1.08E-02 |          | (Zetterdahl et al., 2016) |
| ME MSD      | MDO       | 0.10               |          | 8.69E-06 | 3.80E-05 |          |          |          | (Moldanová et al., 2013)  |
| ME MSD      | MDO       | 0.13               |          | 2.29E-06 | 1.25E-04 | 1.70E-06 |          |          | (Zhang et al., 2016)      |
| ME HSD      | MDO       | 0.08               |          | 5.08E-05 | 4.25E-05 | 7.77E-05 |          |          |                           |
| AE MSD      | MGO       | 0.03               |          | 3.06E-06 | 1.43E-06 | 3.06E-06 | 2.45E-04 | 1.98E-04 | (Moldanová et al., 2013)  |
| AE MSD      | MGO       | 0.06               | 2.00E-05 | 1.40E-04 | 1.50E-04 | 4.00E-05 | 3.10E-04 | 3.00E-04 | (Agrawal et al., 2008a)   |

54

55 **Table S2.** Emission factors for ships used in this study (Unit: g·kWh<sup>-1</sup>)

| Engine type | Fuel Type | Sulfur content | Cu       | Fe       | V        | Ni       | Zn       | Al       |
|-------------|-----------|----------------|----------|----------|----------|----------|----------|----------|
| ME SSD      | HFO       | 2.7%           | 4.74E-05 | 5.12E-03 | 1.94E-02 | 9.50E-03 | 1.88E-04 | 1.77E-02 |
| ME MSD      | HFO       | 2.7%           | 7.27E-05 | 1.27E-03 | 1.24E-02 | 4.21E-03 | 3.03E-04 | 3.89E-04 |
|             | MDO       | 0.5%           | 1.67E-04 | 3.18E-04 | 2.66E-04 | 9.77E-05 | 3.33E-03 | 2.90E-03 |
| ME HSD      | MDO       | 0.5%           | 1.67E-04 | 6.09E-04 | 6.37E-04 | 1.92E-04 | 3.33E-03 | 2.90E-03 |
| AE MSD      | MGO       | 0.5%           | 1.67E-04 | 6.09E-04 | 6.37E-04 | 1.92E-04 | 3.33E-03 | 2.90E-03 |

56

57 **Table S3.** Dust metal emission factors in previous studies and applied in this study (Unit: %)

|        | Cu       | Fe       | V        | Ni       | Zn       | Al       | Source                   |
|--------|----------|----------|----------|----------|----------|----------|--------------------------|
| PM3    | 1.54E-04 |          | 9.22E-05 | 4.78E-05 | 1.35E-04 | 7.67E-02 | (Li et al., 2022)        |
| Coarse | 1.59E-05 |          | 6.33E-05 | 2.18E-05 | 7.16E-05 | 6.00E-02 |                          |
| Coarse | 4.71E-05 | 2.44E-02 | 6.95E-05 | 5.10E-05 | 1.20E-04 |          | (Luo et al., 2022)       |
| Coarse | 3.00E-05 | 2.35E-02 | 6.38E-05 | 4.20E-05 | 8.70E-05 |          |                          |
| Coarse | 4.77E-05 | 3.78E-02 |          | 7.03E-05 | 1.93E-04 | 4.09E-02 | (Abbasi et al., 2021)    |
| Coarse | 3.80E-05 | 3.80E-02 |          | 7.00E-05 | 1.45E-04 | 4.10E-02 |                          |
| Coarse |          | 2.86E-02 |          |          |          | 6.03E-02 | (Baker et al., 2020)     |
| Coarse | 3.41E-05 | 3.84E-02 |          | 2.91E-05 | 9.31E-05 | 7.58E-02 | (Nishikawa et al., 2013) |
| Coarse | 5.00E-05 | 7.70E-02 | 5.00E-04 | 1.00E-04 | 1.00E-04 | 8.40E-02 | (Desboeufs et al., 2005) |
| Coarse | 1.00E-05 | 2.44E-02 | 3.00E-05 | 6.70E-05 | 1.60E-04 | 7.84E-02 |                          |
| Fine   | 1.77E-04 | 3.36E-02 | 1.16E-04 | 5.70E-05 | 1.32E-03 | 5.70E-02 | Applied in this study    |
| Coarse | 3.36E-05 | 3.24E-02 | 6.36E-05 | 5.10E-05 | 9.93E-05 | 6.86E-02 |                          |

58

59 **Table S4.** Solubility of metals in previous studies and applied in this study (Unit: %)



| Mode   |       | Cu     | Fe     | V      | Ni     | Zn     | Al     | Source                     |
|--------|-------|--------|--------|--------|--------|--------|--------|----------------------------|
| Fine   | Total | 0.6146 | 0.232  | 0.6842 | 0.41   | 0.8608 | 0.1404 | (Jiang et al., 2014)       |
|        |       | 0.1643 |        | 0.4342 | 0.1314 | 0.6678 |        | (Wang et al., 2015)        |
|        |       | 0.349  | 0.046  |        | 0.068  | 0.413  |        | (Liu et al., 2022)         |
|        |       | 0.5769 | 0.4667 | 0.421  | 0.568  | 0.7    |        | (Karthikeyan et al., 2006) |
|        |       | 0.51   | /      | 0.43   | 0.49   | 0.73   | 0.14   | Applied in this study      |
| Coarse | Total | 0.41   | 0.027  | -      | -      | 0.816  | 0.0472 | (Jiang et al., 2014)       |
|        |       | 0.51   | 0.077  | 0.55   | 0.26   | 0.84   | 0.051  | (Hsu et al., 2010)         |
|        |       | 0.47   | 0.012  | 0.262  |        | 0.463  |        | (Wang et al., 2015)        |
|        |       | 0.41   | 0.274  | 0.326  | 0.284  | 0.423  |        | (Karthikeyan et al., 2006) |
|        |       | 0.14   | 0.066  |        | 0.12   | 0.57   | 0.45   | (Jickells et al., 2016)    |
|        |       | 0.45   | /      | 0.38   | 0.27   | 0.62   | 0.049  | Applied in this study      |
| Fine   | Dust  |        | 0.01   |        |        |        |        | (Kurusu et al., 2021)      |
|        | Land  |        | 0.08   |        |        |        |        | (Ito, 2015)                |
|        | Ship  |        | 0.65   |        |        |        |        |                            |
| Coarse | Dust  |        | 0.017  |        |        |        |        | (Ooki et al., 2009)        |
|        | Land  |        | 0.025  |        |        |        |        | (Baker et al., 2020)       |

60

61 **Table S5.** Monthly metal emissions from ships in 2017 (Unit: tons·month<sup>-1</sup>)

| Month | Cu     | Fe      | V        | Ni      | Zn      | Al       |
|-------|--------|---------|----------|---------|---------|----------|
| 01    | 1.1825 | 34.6850 | 129.0917 | 61.7265 | 18.2189 | 121.8235 |
| 02    | 1.1118 | 31.7941 | 118.4216 | 56.1886 | 17.2285 | 111.6897 |
| 03    | 1.3335 | 36.7252 | 136.4392 | 64.6687 | 20.8952 | 129.2200 |
| 04    | 1.4518 | 41.3125 | 153.5250 | 72.8817 | 22.5648 | 145.2409 |
| 05    | 1.4068 | 43.3444 | 162.0243 | 77.0775 | 21.3147 | 151.9547 |

|     |         |          |           |          |          |           |
|-----|---------|----------|-----------|----------|----------|-----------|
| 06  | 1.2169  | 36.9126  | 137.9572  | 65.5797  | 18.5189  | 129.4294  |
| 07  | 1.5311  | 45.1684  | 169.1841  | 80.2542  | 23.4339  | 158.3524  |
| 08  | 1.5608  | 43.9847  | 164.3985  | 77.8443  | 24.2096  | 154.3517  |
| 09  | 1.2467  | 34.1564  | 127.2538  | 60.1975  | 19.5106  | 119.8588  |
| 10  | 1.5415  | 43.1018  | 161.1650  | 76.1933  | 23.9349  | 150.8402  |
| 11  | 1.6353  | 45.4896  | 170.3909  | 80.4884  | 25.3904  | 159.1439  |
| 12  | 1.6341  | 46.1274  | 172.7453  | 81.6644  | 25.2818  | 161.3140  |
| Sum | 16.8529 | 482.8020 | 1802.5965 | 854.7649 | 260.5023 | 1693.2192 |

62

63 **Table S6.** Monthly fine mode metal emissions from land anthropogenic sources in 2017 (Unit: tons·month<sup>-1</sup>)

| Month | Cu      | Fe        | V       | Ni      | Zn       | Al        |
|-------|---------|-----------|---------|---------|----------|-----------|
| 01    | 626.35  | 11077.53  | 566.88  | 517.94  | 1373.93  | 13178.09  |
| 02    | 538.29  | 10242.82  | 523.12  | 453.34  | 1112.31  | 11625.46  |
| 03    | 551.13  | 10499.15  | 516.35  | 449.68  | 1115.10  | 12020.72  |
| 04    | 543.95  | 10296.52  | 539.68  | 457.48  | 1069.83  | 11301.25  |
| 05    | 533.11  | 10285.04  | 530.53  | 448.49  | 1056.53  | 11501.22  |
| 06    | 529.13  | 10342.16  | 527.65  | 446.97  | 1055.52  | 11647.78  |
| 07    | 517.53  | 10288.07  | 535.65  | 445.04  | 1053.97  | 12082.21  |
| 08    | 511.01  | 10185.41  | 513.17  | 429.63  | 1047.99  | 12167.32  |
| 09    | 527.01  | 10223.80  | 505.84  | 432.51  | 1051.61  | 11659.44  |
| 10    | 549.53  | 10486.76  | 542.89  | 458.17  | 1091.11  | 11977.92  |
| 11    | 557.35  | 10560.46  | 541.44  | 464.38  | 1127.93  | 12093.87  |
| 12    | 594.54  | 10952.06  | 551.70  | 490.91  | 1251.36  | 12789.79  |
| Sum   | 6578.94 | 125439.79 | 6394.90 | 5494.52 | 13407.19 | 144045.08 |

64

65 **Table S7.** Monthly coarse mode metal emissions from land anthropogenic sources in 2017 (Unit: tons·month<sup>-1</sup>)

| Month | Cu      | Fe       | V       | Ni      | Zn      | Al       |
|-------|---------|----------|---------|---------|---------|----------|
| 01    | 461.51  | 7255.44  | 139.25  | 879.44  | 685.35  | 8324.76  |
| 02    | 493.37  | 6678.36  | 147.77  | 354.98  | 714.29  | 8011.84  |
| 03    | 534.38  | 6955.81  | 150.49  | 302.30  | 750.38  | 8052.39  |
| 04    | 564.46  | 6757.91  | 154.73  | 230.91  | 775.96  | 8500.91  |
| 05    | 547.67  | 6644.82  | 152.76  | 208.55  | 768.33  | 8327.12  |
| 06    | 534.57  | 6585.42  | 151.23  | 208.17  | 766.45  | 8269.86  |
| 07    | 512.16  | 6792.39  | 149.71  | 209.89  | 758.49  | 8023.75  |
| 08    | 503.29  | 6787.56  | 148.34  | 208.26  | 743.85  | 7694.13  |
| 09    | 540.66  | 6842.74  | 151.52  | 208.03  | 766.84  | 7932.16  |
| 10    | 565.57  | 7131.48  | 154.42  | 235.22  | 784.64  | 8390.68  |
| 11    | 539.02  | 7079.40  | 151.42  | 312.63  | 757.12  | 8270.60  |
| 12    | 499.86  | 7126.84  | 145.26  | 563.84  | 713.47  | 8339.15  |
| Sum   | 6296.51 | 82638.16 | 1796.88 | 3922.21 | 8985.18 | 98137.34 |

67 **Table S8.** Comparison of metals emission inventories with other studies (Units: tons·year<sup>-1</sup>)

| Area      | Emission Source               | Period | V       | V-this study <sup>a</sup> | Ni     | Ni-this study | Zn      | Zn-this study | Cu     | Cu-this study | Source                           |
|-----------|-------------------------------|--------|---------|---------------------------|--------|---------------|---------|---------------|--------|---------------|----------------------------------|
| China     | Solid Waste                   | 2013   |         |                           | 43.5   | 27.9          | 1790.7  | 2194.0        | 382.4  | 185.6         | (Wang et al., 2017) <sup>b</sup> |
|           | solid waste incineration      |        | 0.27    | 0.67                      |        |               |         |               |        |               |                                  |
|           | No-road transport             |        | 1247.0  | 1803.7                    |        |               |         |               |        |               |                                  |
| China     | Iron and steel production     | 2017   | 79.6    | 109.2                     |        |               |         |               |        |               | (Bai et al., 2021) <sup>c</sup>  |
|           | Domestic coal combustion      |        | 10.5    | 75.6                      |        |               |         |               |        |               |                                  |
|           | Total                         |        | 11505.0 | 16394.8                   |        |               |         |               |        |               |                                  |
| China     | iron and steel industry       | 2011   |         |                           | 105.0  | 196.1         |         |               | 448.8  | 528.5         | (Wang et al., 2016)              |
| East Asia | Ship                          | 2015   | 1329.8  | 1802.6                    | 580.4  | 854.8         |         |               |        |               | (Zhao et al., 2021) <sup>c</sup> |
| China     | primary anthropogenic sources | 2012   |         |                           | 3395.5 | 5458.0        | 22319.6 | 22526.9       | 9547.6 | 12793.1       | (Tian et al., 2015)              |
| China     | primary anthropogenic sources | 2017   |         |                           |        |               | 19473.1 | 22526.9       | 9813.1 | 12793.1       | (Liu et al., 2023)               |

68

69 **Table S9.** Comparison of mean annual concentration of metals in PM<sub>2.5</sub> from other studies (Units: ng·m<sup>-3</sup>)

| Area | Periods | Longitude | Latitude | Cu | Fe | V | Ni | Zn | Al | Source |
|------|---------|-----------|----------|----|----|---|----|----|----|--------|
|------|---------|-----------|----------|----|----|---|----|----|----|--------|

|              |           |          |         |       |         |       |      |        |        |                       |
|--------------|-----------|----------|---------|-------|---------|-------|------|--------|--------|-----------------------|
| East Asia    | 2017      |          |         | 3.55  | 112.56  | 4.38  | 3.25 | 33.02  | 135.78 | This study            |
| Shanghai     | 2018-2019 | 120.97°E | 31.09°N | 3.85  | 194.5   | 5.54  | 3.18 | 40.84  | 400.1  | (Zou et al., 2020)    |
| Beijing      | 2010      | 116.30°E | 39.99°N | 34    | 1696    | 4     | 4    | 270    | 1823   | (Tao et al., 2016)    |
| Chengdu      | 2011      | 104.7°E  | 30.65°N | 23    | 693     | 1.7   | 2.5  | 350    | 560    | (Tao et al., 2014)    |
| Guangzhou    | 2014      | 113.35°E | 23.12°N | 37    | 353     | 9     | 4    | 225    | 305    | (Tao et al., 2017)    |
| Gunshan      | 2012-2013 | 126.71°E | 35.98°N | 29    | 237     | -     | 13   | 113    | 166    | (Jeon et al., 2012)   |
| Handan       | 2013      | 114.50°E | 36.69°N | 18.8  | -       | 5.4   | 3.4  | 300    | -      | (Wei et al., 2014)    |
| Hangzhou     | 2005      | 120.15°E | 30.28°N | 71    | -       | -     | 3    | 130    | -      | (Liu et al., 2015)    |
| Jinan        | 2007      | 116.98°E | 36.67°N | 30    | 1300    | 7.35  | 9.05 | 700    | 890    | (Zhang et al., 2018b) |
| Lanzhou      | 2012-2013 | 103.81°E | 36.03°N | 47.06 | -       | 7.97  | 9.4  | 322    | -      | (Tan et al., 2017)    |
| Nanjing      | 2013      | 118.76°E | 32.05°N | 71.5  | 902     | 5.19  | 16   | 497    | 811.5  | (Li et al., 2016)     |
| Niigata      | 2016      | 138.86°E | 37.80°N | 2.14  | 82.4    | 1.13  | 6.06 | 10.9   | 144    | (Li et al., 2018)     |
| Qingdao      | 2007      | 120.38°E | 36.07°N | 20    | 630     | 9.99  | 6.24 | 270    | 470    | (Zhang et al., 2018b) |
| Shanghai     | 2010      | 121.53°E | 31.22°N | 15    | 1328    | -     | 9    | 236    | 1542   | (Wang et al., 2013)   |
| Taian        | 2014      | 117.11°E | 36.18°N | 40    | 1055    | -     | 10   | 220    | 350    | (Liu et al., 2016)    |
| Tianjin      | 2008      | 117.20°E | 39.12°N | 38.9  | 145.1   | 2.2   | -    | 339.4  | 69.8   | (Gu et al., 2011)     |
| Tuoji-island | 2012      | 120.76°E | 38.17°N | 12.6  | 466     | 6     | 4    | 94.3   | -      | (Zhang et al., 2014)  |
| Wuhan        | 2013      | 114.21°E | 30.30°N | 25.27 | 1680    | -     | 4.8  | 290.78 | -      | (Zhang et al., 2015)  |
| Wuhan        | 2014      | 114.17°E | 30.36°N | 30.13 | 1820.76 | 6.35  | 3.57 | 419.21 | -      | (Acciai et al., 2017) |
| Xiamen       | 2015      | 118.03°E | 24.30°N | 26    | 250     | 10.95 | 5.37 | 220    | 280    | (Zhuang, 2016)        |

|                       |      |          |         |      |        |      |      |       |       |                       |
|-----------------------|------|----------|---------|------|--------|------|------|-------|-------|-----------------------|
| Zaozhuang             | 2007 | 117.32°E | 34.82°N | 40   | 1000   | 6.11 | 9.85 | 1220  | 630   | (Zhang et al., 2018b) |
| Zhengzhou             | 2010 | 113.51°E | 34.80°N | 24.1 | 1248.8 | 3.7  | 3.3  | 444.1 | 579.6 | (Geng et al., 2013)   |
| Zhuhai                | 2014 | 113.53°E | 22.36°N | 20   | 212    | 12   | 7    | 149   | 309   | (Tao et al., 2017)    |
| the East<br>China Sea |      |          |         | 58   | 410    | 3.8  | 1.5  | 51    | 615   | (Hsu et al., 2010)    |

70

71 **Table S10.** Comparison of mean annual deposition flux of metals from other studies (Units:  $\text{mg}\cdot\text{m}^{-2}\cdot\text{year}^{-1}$ )

| Area           | Periods            | Cu    | Fe     | V    | Ni    | Zn     | Al     | Source                |
|----------------|--------------------|-------|--------|------|-------|--------|--------|-----------------------|
| East Asia      | 2017               | 0.55  | 62.20  | 0.42 | 0.47  | 1.05   | 119.43 | This study            |
| China          | 2000-2018          | 12.77 |        |      | 6.61  | 96.75  |        | (Chen et al., 2022)   |
| North China    | 2008-2018          | 16.30 |        |      | 16.40 | 129.80 |        | (Peng et al., 2019)   |
| South China    | 2008-2019          | 18.80 |        |      | 4.89  | 88.60  |        |                       |
| Tokyo Bay      | 2004-2005          | 16.00 |        | 6.90 | 6.80  |        |        | (Sakata et al., 2008) |
| Kushiro        | 2008               | 0.57  | 70.81  |      | 0.72  | 4.02   | 146.00 |                       |
|                |                    | 0.11  | 20.55  | 0.23 | 0.14  | 0.02   | 35.97  |                       |
| Otsuchi        | 2008               | 2.21  | 204.77 |      | 0.74  | 14.60  | 356.61 | (Okubo et al., 2013)  |
|                |                    | 0.24  | 47.39  | 0.52 | 0.29  | 0.05   | 90.17  |                       |
| Hedo           | 2008               | 0.35  | 62.05  |      | 0.80  | 5.48   | 105.12 |                       |
|                |                    | 0.33  | 20.20  | 0.62 | 0.47  | 0.06   | 33.29  |                       |
| Pearl<br>Delta | River<br>2001-2002 | 18.60 | 555.00 | 2.09 | 8.35  | 104.00 |        | (Wong et al., 2003)   |
| China          | 2006-2015          | 11.56 |        |      | 8.08  | 72.90  |        | (Ni and Ma, 2018)     |

|                 |           |       |         |      |      |        |         |                               |
|-----------------|-----------|-------|---------|------|------|--------|---------|-------------------------------|
| Spain           | 2004-2006 | 0.79  | 347.00  |      | 0.65 | 6.26   | 457.00  | (Bacardit and Camarero, 2009) |
| Jiangsu         | 2019      | 11.00 |         |      | 3.30 | 157.00 |         | (Chen et al., 2019)           |
| Northern China  | 2007-2010 | 15.10 | 3957.10 | 5.35 | 7.87 | 106.50 | 5046.50 | (Pan and Wang, 2015)          |
| Guizhou         | 2018      | 1.22  |         |      |      | 30.27  |         | (Lin et al., 2022)            |
|                 |           | 0.41  | 30.46   | 0.80 | 0.54 | 0.11   | 49.08   |                               |
| Beijing         | 2016-2020 |       |         | 0.16 | 0.53 | 6.18   |         | (Pan et al., 2021)            |
|                 |           | 0.46  | 118.69  | 1.00 | 0.55 | 0.11   | 240.99  |                               |
| Hunan           | 2016-2018 | 6.41  |         |      | 1.57 | 73.09  |         | (Feng et al., 2019)           |
|                 |           | 0.41  | 28.60   | 0.77 | 0.55 | 0.10   | 47.03   |                               |
| Mount Emei      | 2017-2022 | 1.70  | 6.93    |      |      | 41.40  | 6.38    | (Fu et al., 2023)             |
| Daya Bay, China | 2015-2017 | 4.67  | 209.37  | 2.41 | 1.91 | 93.96  | 477.40  | (Wu et al., 2018)             |
|                 |           | 0.47  | 29.78   | 0.95 | 0.66 | 0.20   | 45.07   |                               |
| Lushan          | 2011-2012 | 6.29  | 0.00    | 9.99 | 2.94 | 112.87 | 854.40  | (Nie et al., 2017)            |
|                 |           | 0.41  | 18.24   | 0.68 | 0.56 | 0.06   | 30.44   |                               |

## 73 References

- 74 Abbasi, S., Rezaei, M., Keshavarzi, B., Mina, M., Ritsema, C., and Geissen, V.: Investigation of the 2018 Shiraz dust event:  
75 Potential sources of metals, rare earth elements, and radionuclides; health assessment, *Chemosphere*, 279, 130533,  
76 10.1016/j.chemosphere.2021.130533, 2021.
- 77 Acciai, C., Zhang, Z., Wang, F., Zhong, Z., and Lonati, G.: Characteristics and Source Analysis of Trace Elements in PM<sub>2.5</sub>  
78 in the Urban Atmosphere of Wuhan in Spring, *Aerosol and Air Quality Research*, 17, 2224-2234,  
79 10.4209/aaqr.2017.06.0207, 2017.
- 80 Agrawal, H., Welch, W. A., Miller, J. W., and Cocker, D. R.: Emission Measurements from a Crude Oil Tanker at Sea,  
81 *Environmental Science & Technology*, 42, 7098-7103, 10.1021/es703102y, 2008a.
- 82 Agrawal, H., Malloy, Q. G. J., Welch, W. A., Wayne Miller, J., and Cocker, D. R.: In-use gaseous and particulate matter  
83 emissions from a modern ocean going container vessel, *Atmospheric Environment*, 42, 5504-5510,  
84 10.1016/j.atmosenv.2008.02.053, 2008b.
- 85 Bacardit, M. and Camarero, L.: Fluxes of Al, Fe, Ti, Mn, Pb, Cd, Zn, Ni, Cu, and As in monthly bulk deposition over the  
86 Pyrenees (SW Europe): The influence of meteorology on the atmospheric component of trace element cycles and its  
87 implications for high mountain lakes, *Journal of Geophysical Research: Biogeosciences*, 114, 10.1029/2008JG000732,  
88 2009.
- 89 Bai, X., Luo, L., Tian, H., Liu, S., Hao, Y., Zhao, S., Lin, S., Zhu, C., Guo, Z., and Lv, Y.: Atmospheric Vanadium Emission  
90 Inventory from Both Anthropogenic and Natural Sources in China, *Environmental Science & Technology*, 55, 11568-  
91 11578, 10.1021/acs.est.1c04766, 2021.
- 92 Baker, A. R., Li, M., and Chance, R.: Trace Metal Fractional Solubility in Size-Segregated Aerosols From the Tropical Eastern  
93 Atlantic Ocean, *Global Biogeochemical Cycles*, 34, e2019GB006510, 10.1029/2019GB006510, 2020.
- 94 Celio, V., Dabek-Zlotorzynska, E., and McCurdy, M.: Chemical Characterization of Exhaust Emissions from Selected  
95 Canadian Marine Vessels: The Case of Trace Metals and Lanthanoids, *Environmental Science & Technology*, 49, 5220-  
96 5226, 10.1021/acs.est.5b00127, 2015.
- 97 Chen, D., Wang, X., Li, Y., Lang, J., Zhou, Y., Guo, X., and Zhao, Y.: High-spatiotemporal-resolution ship emission inventory  
98 of China based on AIS data in 2014, *Science of The Total Environment*, 609, 776-787, 10.1016/j.scitotenv.2017.07.051,  
99 2017.
- 100 Chen, L., Zhou, S., Wu, S., Wang, C., and He, D.: Concentration, fluxes, risks, and sources of heavy metals in atmospheric  
101 deposition in the Lihe River watershed, Taihu region, eastern China, *Environmental Pollution*, 255, 113301,  
102 10.1016/j.envpol.2019.113301, 2019.



103 Chen, Q., Gao, Y., Ni, R., Pan, Y., Yan, Y., Yang, J., Liu, X., and Gu, X.: Temporal and Spatial Variation Characteristics of  
104 Heavy Metal in Atmospheric Deposition in China from 2000 to 2018, *Environmental Science*, 43,  
105 10.13227/j.hjkx.202201135, 2022.

106 Clough, S. A., Shephard, M. W., Mlawer, E. J., Delamere, J. S., Iacono, M. J., Cady-Pereira, K., Boukabara, S., and Brown,  
107 P. D.: Atmospheric radiative transfer modeling: a summary of the AER codes, *Journal of Quantitative Spectroscopy and*  
108 *Radiative Transfer*, 91, 233-244, 10.1016/j.jqsrt.2004.05.058, 2005.

109 Corbin, J. C., Mensah, A. A., Pieber, S. M., Orasche, J., Michalke, B., Zanatta, M., Czech, H., Massabò, D., Buatier de Mongeot,  
110 F., Mennucci, C., El Haddad, I., Kumar, N. K., Stengel, B., Huang, Y., Zimmermann, R., Prévôt, A. S. H., and Gysel, M.:  
111 Trace Metals in Soot and PM<sub>2.5</sub> from Heavy-Fuel-Oil Combustion in a Marine Engine, *Environmental Science &*  
112 *Technology*, 52, 6714-6722, 10.1021/acs.est.8b01764, 2018.

113 Desboeufs, K. V., Sofikitis, A., Losno, R., Colin, J. L., and Ausset, P.: Dissolution and solubility of trace metals from natural  
114 and anthropogenic aerosol particulate matter, *Chemosphere*, 58, 195-203, 10.1016/j.chemosphere.2004.02.025, 2005.

115 Fan, Q., Zhang, Y., Ma, W., Ma, H., Feng, J., Yu, Q., Yang, X., Ng, S. K. W., Fu, Q., and Chen, L.: Spatial and Seasonal  
116 Dynamics of Ship Emissions over the Yangtze River Delta and East China Sea and Their Potential Environmental  
117 Influence, *Environmental Science & Technology*, 50, 1322-1329, 10.1021/acs.est.5b03965, 2016.

118 Feng, W., Guo, Z., Peng, C., Xiao, X., Shi, L., Zeng, P., Ran, H., and Xue, Q.: Atmospheric bulk deposition of heavy  
119 metal(loid)s in central south China: Fluxes, influencing factors and implication for paddy soils, *Journal of Hazardous*  
120 *Materials*, 371, 634-642, 10.1016/j.jhazmat.2019.02.090, 2019.

121 Fu, Y., Tang, Y., Shu, X., Hopke, P. K., He, L., Ying, Q., Xia, Z., Lei, M., and Qiao, X.: Changes of atmospheric metal(loid)  
122 deposition from 2017 to 2021 at Mount Emei under China's air pollution control strategy, *Atmospheric Environment*, 302,  
123 119714, 10.1016/j.atmosenv.2023.119714, 2023.

124 Geng, N., Wang, J., Xu, Y., Zhang, W., Chen, C., and Zhang, R.: PM<sub>2.5</sub> in an industrial district of Zhengzhou, China: Chemical  
125 composition and source apportionment, *Particuology*, 11, 99-109, 10.1016/j.partic.2012.08.004, 2013.

126 Gu, J., Bai, Z., Li, W., Wu, L., Liu, A., Dong, H., and Xie, Y.: Chemical composition of PM<sub>2.5</sub> during winter in Tianjin, China,  
127 *Particuology*, 9, 215-221, 10.1016/j.partic.2011.03.001, 2011.

128 Hsu, S.-C., Wong, G. T. F., Gong, G.-C., Shiah, F.-K., Huang, Y.-T., Kao, S.-J., Tsai, F., Candice Lung, S.-C., Lin, F.-J., Lin,  
129 I. I., Hung, C.-C., and Tseng, C.-M.: Sources, solubility, and dry deposition of aerosol trace elements over the East China  
130 Sea, *Marine Chemistry*, 120, 116-127, 10.1016/j.marchem.2008.10.003, 2010.

131 Ito, A.: Atmospheric Processing of Combustion Aerosols as a Source of Bioavailable Iron, *Environmental Science &*  
132 *Technology Letters*, 2, 70-75, 10.1021/acs.estlett.5b00007, 2015.

133 Jeon, H.-L., Choi, S.-H., Im, J.-Y., Park, H.-J., Hong, E.-J., and Son, B.-S.: Chemical Characteristics of Heavy Metals of  
134 PM<sub>2.5</sub> in Atmosphere, *Korean Journal of Environmental Health Sciences*, 38, 233-240, 10.5668/JEHS.2012.38.3.233,  
135 2012.

136 Jiang, S. Y. N., Yang, F., Chan, K. L., and Ning, Z.: Water solubility of metals in coarse PM and PM<sub>2.5</sub> in typical urban  
137 environment in Hong Kong, *Atmospheric Pollution Research*, 5, 236-244, 10.5094/APR.2014.029, 2014.

138 Jickells, T. D., Baker, A. R., and Chance, R.: Atmospheric transport of trace elements and nutrients to the oceans, *Philosophical  
139 Transactions of the Royal Society A: Mathematical, Physical and Engineering Sciences*, 374, 20150286,  
140 10.1098/rsta.2015.0286, 2016.

141 Kain, J. S.: The Kain–Fritsch Convective Parameterization: An Update, *Journal of Applied Meteorology*, 43, 170-181,  
142 10.1175/1520-0450(2004)043<0170:TKCPAU>2.0.CO;2, 2004.

143 Karthikeyan, S., Joshi, U. M., and Balasubramanian, R.: Microwave assisted sample preparation for determining water-soluble  
144 fraction of trace elements in urban airborne particulate matter: Evaluation of bioavailability, *Analytica Chimica Acta*, 576,  
145 23-30, 10.1016/j.aca.2006.05.051, 2006.

146 Kurisu, M., Sakata, K., Uematsu, M., Ito, A., and Takahashi, Y.: Contribution of combustion Fe in marine aerosols over the  
147 northwestern Pacific estimated by Fe stable isotope ratios, *Atmos. Chem. Phys.*, 21, 16027-16050, 10.5194/acp-21-  
148 16027-2021, 2021.

149 Li, F., Yang, H., Ayyamperumal, R., and Liu, Y.: Pollution, sources, and human health risk assessment of heavy metals in  
150 urban areas around industrialization and urbanization-Northwest China, *Chemosphere*, 308, 136396,  
151 10.1016/j.chemosphere.2022.136396, 2022.

152 Li, H., Wang, Q. g., Yang, M., Li, F., Wang, J., Sun, Y., Wang, C., Wu, H., and Qian, X.: Chemical characterization and source  
153 apportionment of PM<sub>2.5</sub> aerosols in a megacity of Southeast China, *Atmospheric Research*, 181, 288-299,  
154 10.1016/j.atmosres.2016.07.005, 2016.

155 Li, M., Zhang, Q., Kurokawa, J. I., Woo, J. H., He, K., Lu, Z., Ohara, T., Song, Y., Streets, D. G., Carmichael, G. R., Cheng,  
156 Y., Hong, C., Huo, H., Jiang, X., Kang, S., Liu, F., Su, H., and Zheng, B.: MIX: a mosaic Asian anthropogenic emission  
157 inventory under the international collaboration framework of the MICS-Asia and HTAP, *Atmos. Chem. Phys.*, 17, 935-  
158 963, 10.5194/acp-17-935-2017, 2017.

159 Li, P., Sato, K., Hasegawa, H., Huo, M., Minoura, H., Inomata, Y., Take, N., Yuba, A., Futami, M., Takahashi, T., and Kotake,  
160 Y.: Chemical Characteristics and Source Apportionment of PM<sub>2.5</sub> and Long-Range Transport from Northeast Asia  
161 Continent to Niigata in Eastern Japan, *Aerosol and Air Quality Research*, 18, 938-956, 10.4209/aaqr.2017.05.0181, 2018.

162 Lin, S.-x., Zhang, Z.-l., Xiao, Z.-q., Liu, X.-l., and Zhang, Q.-h.: Atmospheric deposition fluxes and health risk assessment of  
163 potentially toxic elements in Caohai Lake (Guizhou Province, China), *Journal of Mountain Science*, 19, 1107-1118,  
164 10.1007/s11629-021-7170-z, 2022.

165 Liu, B., Song, N., Dai, Q., Mei, R., Sui, B., Bi, X., and Feng, Y.: Chemical composition and source apportionment of ambient  
166 PM<sub>2.5</sub> during the non-heating period in Taian, China, *Atmospheric Research*, 170, 23-33,  
167 10.1016/j.atmosres.2015.11.002, 2016.

168 Liu, G., Li, J., Wu, D., and Xu, H.: Chemical composition and source apportionment of the ambient PM<sub>2.5</sub> in Hangzhou,  
169 China, *Particuology*, 18, 135-143, 10.1016/j.partic.2014.03.011, 2015.

170 Liu, M., Wang, W., Li, J., Wang, T., Xu, Z., Song, Y., Zhang, W., Zhou, L., Lian, C., Yang, J., Li, Y., Sun, Y., Tong, S., Guo,  
171 Y., and Ge, M.: High fraction of soluble trace metals in fine particles under heavy haze in central China, *Science of The*  
172 *Total Environment*, 841, 156771, 10.1016/j.scitotenv.2022.156771, 2022.

173 Liu, S., Tian, H., Zhu, C., Cheng, K., Wang, Y., Luo, L., Bai, X., Hao, Y., Lin, S., Zhao, S., Wang, S., Chu, B., Guo, Z., Lv,  
174 Y., and Hao, J.: Reduced but still noteworthy atmospheric pollution of trace elements in China, *One Earth*, 6, 536-547,  
175 10.1016/j.oneear.2023.04.006, 2023.

176 Luo, H., Wang, Q., Guan, Q., Ma, Y., Ni, F., Yang, E., and Zhang, J.: Heavy metal pollution levels, source apportionment and  
177 risk assessment in dust storms in key cities in Northwest China, *Journal of Hazardous Materials*, 422, 126878,  
178 10.1016/j.jhazmat.2021.126878, 2022.

179 Moldanová, J., Fridell, E., Winnes, H., Holmin-Fridell, S., Boman, J., Jedynska, A., Tishkova, V., Demirdjian, B., Joulie, S.,  
180 Bladt, H., Ivleva, N. P., and Niessner, R.: Physical and chemical characterisation of PM emissions from two ships  
181 operating in European Emission Control Areas, *Atmos. Meas. Tech.*, 6, 3577-3596, 10.5194/amt-6-3577-2013, 2013.

182 Ni, R. and Ma, Y.: Current inventory and changes of the input/output balance of trace elements in farmland across China,  
183 *PLOS ONE*, 13, e0199460, 10.1371/journal.pone.0199460, 2018.

184 Nie, X., Wang, Y., Li, Y., Sun, L., Li, T., Yang, M., Yang, X., and Wang, W.: Characteristics and impacts of trace elements  
185 in atmospheric deposition at a high-elevation site, southern China, *Environmental Science and Pollution Research*, 24,  
186 22839-22851, 10.1007/s11356-017-8791-1, 2017.

187 Nishikawa, M., Batdorj, D., Ukachi, M., Onishi, K., Nagano, K., Mori, I., Matsui, I., and Sano, T.: Preparation and chemical  
188 characterisation of an Asian mineral dust certified reference material, *Analytical Methods*, 5, 4088-4095,  
189 10.1039/C3AY40435H, 2013.

190 Okubo, A., Takeda, S., and Obata, H.: Atmospheric deposition of trace metals to the western North Pacific Ocean observed at  
191 coastal station in Japan, *Atmospheric Research*, 129-130, 20-32, 10.1016/j.atmosres.2013.03.014, 2013.

192 Ooki, A., Nishioka, J., Ono, T., and Noriki, S.: Size dependence of iron solubility of Asian mineral dust particles, *Journal of*  
193 *Geophysical Research: Atmospheres*, 114, 10.1029/2008JD010804, 2009.

194 Pan, Y., Liu, J., Zhang, L., Cao, J., Hu, J., Tian, S., Li, X., and Xu, W.: Bulk Deposition and Source Apportionment of  
195 Atmospheric Heavy Metals and Metalloids in Agricultural Areas of Rural Beijing during 2016–2020, *Atmosphere*, 12,  
196 283, 10.3390/atmos12020283, 2021.

197 Pan, Y. P. and Wang, Y. S.: Atmospheric wet and dry deposition of trace elements at 10 sites in Northern China, *Atmos. Chem.*  
198 *Phys.*, 15, 951-972, 10.5194/acp-15-951-2015, 2015.

199 Peng, H., Chen, Y., Weng, L., Ma, J., Ma, Y., Li, Y., and Islam, M. S.: Comparisons of heavy metal input inventory in  
200 agricultural soils in North and South China: A review, *Science of The Total Environment*, 660, 776-786,  
201 10.1016/j.scitotenv.2019.01.066, 2019.

202 Pleim, J. E.: A Combined Local and Nonlocal Closure Model for the Atmospheric Boundary Layer. Part I: Model Description  
203 and Testing, *Journal of Applied Meteorology and Climatology*, 46, 1383-1395, 10.1175/JAM2539.1, 2007.

204 Sakata, M., Tani, Y., and Takagi, T.: Wet and dry deposition fluxes of trace elements in Tokyo Bay, *Atmospheric Environment*,  
205 42, 5913-5922, 10.1016/j.atmosenv.2008.03.027, 2008.

206 Sippula, O., Stengel, B., Sklorz, M., Streibel, T., Rabe, R., Orasche, J., Lintelmann, J., Michalke, B., Abbaszade, G., Radischat,  
207 C., Gröger, T., Schnelle-Kreis, J., Harndorf, H., and Zimmermann, R.: Particle Emissions from a Marine Engine:  
208 Chemical Composition and Aromatic Emission Profiles under Various Operating Conditions, *Environmental Science &*  
209 *Technology*, 48, 11721-11729, 10.1021/es502484z, 2014.

210 Streibel, T., Schnelle-Kreis, J., Czech, H., Harndorf, H., Jakobi, G., Jokiniemi, J., Karg, E., Lintelmann, J., Matuschek, G.,  
211 Michalke, B., Müller, L., Orasche, J., Passig, J., Radischat, C., Rabe, R., Reda, A., Rüger, C., Schwemer, T., Sippula, O.,  
212 Stengel, B., Sklorz, M., Torvela, T., Weggler, B., and Zimmermann, R.: Aerosol emissions of a ship diesel engine  
213 operated with diesel fuel or heavy fuel oil, *Environmental Science and Pollution Research*, 24, 10976-10991,  
214 10.1007/s11356-016-6724-z, 2017.

215 Tan, J., Zhang, L., Zhou, X., Duan, J., Li, Y., Hu, J., and He, K.: Chemical characteristics and source apportionment of PM<sub>2.5</sub>  
216 in Lanzhou, China, *Science of The Total Environment*, 601-602, 1743-1752, 10.1016/j.scitotenv.2017.06.050, 2017.

217 Tao, J., Zhang, L., Zhang, R., Wu, Y., Zhang, Z., Zhang, X., Tang, Y., Cao, J., and Zhang, Y.: Uncertainty assessment of  
218 source attribution of PM<sub>2.5</sub> and its water-soluble organic carbon content using different biomass burning tracers in  
219 positive matrix factorization analysis — a case study in Beijing, China, *Science of The Total Environment*, 543, 326-335,  
220 10.1016/j.scitotenv.2015.11.057, 2016.

221 Tao, J., Gao, J., Zhang, L., Zhang, R., Che, H., Zhang, Z., Lin, Z., Jing, J., Cao, J., and Hsu, S. C.: PM<sub>2.5</sub> pollution  
222 in a megacity of southwest China: source apportionment and implication, *Atmos. Chem. Phys.*, 14, 8679-8699,  
223 10.5194/acp-14-8679-2014, 2014.

224 Tao, J., Zhang, L., Cao, J., Zhong, L., Chen, D., Yang, Y., Chen, D., Chen, L., Zhang, Z., Wu, Y., Xia, Y., Ye, S., and Zhang,  
225 R.: Source apportionment of PM<sub>2.5</sub> at urban and suburban areas of the Pearl River Delta region, south China - With  
226 emphasis on ship emissions, *Science of The Total Environment*, 574, 1559-1570, 10.1016/j.scitotenv.2016.08.175, 2017.

227 Tian, H. Z., Zhu, C. Y., Gao, J. J., Cheng, K., Hao, J. M., Wang, K., Hua, S. B., Wang, Y., and Zhou, J. R.: Quantitative  
228 assessment of atmospheric emissions of toxic heavy metals from anthropogenic sources in China: historical trend, spatial  
229 distribution, uncertainties, and control policies, *Atmos. Chem. Phys.*, 15, 10127-10147, 10.5194/acp-15-10127-2015,  
230 2015.

231 Wang, J., Hu, Z., Chen, Y., Chen, Z., and Xu, S.: Contamination characteristics and possible sources of PM<sub>10</sub> and PM<sub>2.5</sub> in  
232 different functional areas of Shanghai, China, *Atmospheric Environment*, 68, 221-229, 10.1016/j.atmosenv.2012.10.070,  
233 2013.

234 Wang, K., Tian, H., Hua, S., Zhu, C., Gao, J., Xue, Y., Hao, J., Wang, Y., and Zhou, J.: A comprehensive emission inventory  
235 of multiple air pollutants from iron and steel industry in China: Temporal trends and spatial variation characteristics,  
236 *Science of The Total Environment*, 559, 7-14, 10.1016/j.scitotenv.2016.03.125, 2016.

237 Wang, Q., Ma, Y., Tan, J., Zheng, N., Duan, J., Sun, Y., He, K., and Zhang, Y.: Characteristics of size-fractionated atmospheric  
238 metals and water-soluble metals in two typical episodes in Beijing, *Atmospheric Environment*, 119, 294-303,  
239 10.1016/j.atmosenv.2015.08.061, 2015.

240 Wang, Y., Cheng, K., Wu, W., Tian, H., Yi, P., Zhi, G., Fan, J., and Liu, S.: Atmospheric emissions of typical toxic heavy  
241 metals from open burning of municipal solid waste in China, *Atmospheric Environment*, 152, 6-15,  
242 10.1016/j.atmosenv.2016.12.017, 2017.

243 Wei, Z., Wang, L. T., Chen, M. Z., and Zheng, Y.: The 2013 severe haze over the Southern Hebei, China: PM<sub>2.5</sub> composition  
244 and source apportionment, *Atmospheric Pollution Research*, 5, 759-768, 10.5094/APR.2014.085, 2014.

245 Wong, C. S. C., Li, X. D., Zhang, G., Qi, S. H., and Peng, X. Z.: Atmospheric deposition of heavy metals in the Pearl River  
246 Delta, China, *Atmospheric Environment*, 37, 767-776, 10.1016/S1352-2310(02)00929-9, 2003.

247 Wu, Y., Zhang, J., Ni, Z., Liu, S., Jiang, Z., and Huang, X.: Atmospheric deposition of trace elements to Daya Bay, South  
248 China Sea: Fluxes and sources, *Marine Pollution Bulletin*, 127, 672-683, 10.1016/j.marpolbul.2017.12.046, 2018.

249 Xiu, A. and Pleim, J. E.: Development of a Land Surface Model. Part I: Application in a Mesoscale Meteorological Model,  
250 *Journal of Applied Meteorology*, 40, 192-209, 10.1175/1520-0450(2001)040<0192:DOALSM>2.0.CO;2, 2001.

251 Zetterdahl, M., Moldanová, J., Pei, X., Pathak, R. K., and Demirdjian, B.: Impact of the 0.1% fuel sulfur content limit in SECA  
252 on particle and gaseous emissions from marine vessels, *Atmospheric Environment*, 145, 338-345,  
253 10.1016/j.atmosenv.2016.09.022, 2016.

254 Zhang, F., Chen, Y., Tian, C., Lou, D., Li, J., Zhang, G., and Matthias, V.: Emission factors for gaseous and particulate  
255 pollutants from offshore diesel engine vessels in China, *Atmos. Chem. Phys.*, 16, 6319-6334, 10.5194/acp-16-6319-2016,  
256 2016.

257 Zhang, F., Chen, Y., Tian, C., Wang, X., Huang, G., Fang, Y., and Zong, Z.: Identification and quantification of shipping  
258 emissions in Bohai Rim, China, *Science of The Total Environment*, 497-498, 570-577, 10.1016/j.scitotenv.2014.08.016,  
259 2014.

260 Zhang, F., Wang, Z.-w., Cheng, H.-r., Lv, X.-p., Gong, W., Wang, X.-m., and Zhang, G.: Seasonal variations and chemical  
261 characteristics of PM<sub>2.5</sub> in Wuhan, central China, *Science of The Total Environment*, 518-519, 97-105,  
262 10.1016/j.scitotenv.2015.02.054, 2015.

263 Zhang, F., Chen, Y., Chen, Q., Feng, Y., shang, Y., Yang, X., Gao, H., Tian, C., Li, J., Zhang, G., Matthias, V., and Xie, Z.:  
264 Real-World Emission Factors of Gaseous and Particulate Pollutants from Marine Fishing Boats and Their Total Emissions  
265 in China, *Environmental Science & Technology*, 52, 4910-4919, 10.1021/acs.est.7b04002, 2018a.

266 Zhang, J., Zhou, X., Wang, Z., Yang, L., Wang, J., and Wang, W.: Trace elements in PM<sub>2.5</sub> in Shandong Province: Source  
267 identification and health risk assessment, *Science of The Total Environment*, 621, 558-577,  
268 10.1016/j.scitotenv.2017.11.292, 2018b.

269 Zhao, J., Zhang, Y., Xu, H., Tao, S., Wang, R., Yu, Q., Chen, Y., Zou, Z., and Ma, W.: Trace Elements From Ocean-Going  
270 Vessels in East Asia: Vanadium and Nickel Emissions and Their Impacts on Air Quality, *Journal of Geophysical Research:  
271 Atmospheres*, 126, e2020JD033984, 10.1029/2020JD033984, 2021.

272 Zheng, B., Zhang, Q., Geng, G., Chen, C., Shi, Q., Cui, M., Lei, Y., and He, K.: Changes in China's anthropogenic emissions  
273 and air quality during the COVID-19 pandemic in 2020, *Earth Syst. Sci. Data*, 13, 2895-2907, 10.5194/essd-13-2895-  
274 2021, 2021.

275 Zhuang, M.: Characteristic of elements in PM<sub>2.5</sub> and health risk assessment of heavy metals at Xiamen, *Environmental  
276 Chemistry*, 35, 1723-1732, 10.7524/j.issn.0254-6108.2016.08.2016032803, 2016.

277 Zou, Z., Zhao, J., Zhang, C., Zhang, Y., Yang, X., Chen, J., Xu, J., Xue, R., and Zhou, B.: Effects of cleaner ship fuels on air  
278 quality and implications for future policy: A case study of Chongming Ecological Island in China, *Journal of Cleaner  
279 Production*, 267, 122088, 10.1016/j.jclepro.2020.122088, 2020.

280
